# Supplementary material for: No associations between fruit and vegetable consumption and pancreatic cancer risk: a meta-analysis of prospective studies
Source: PubMed Central journal article supplement (PMC6114958; doi:10.18632/oncotarget.23128), 2017-12-08
Supplement: oncotarget-09-32250-s001.pdf [file oncotarget-09-32250-s001.pdf]

# No associations between fruit and vegetable consumption and pancreatic cancer risk: a meta-analysis of prospective studies

## SUPPLEMENTARY MATERIALS

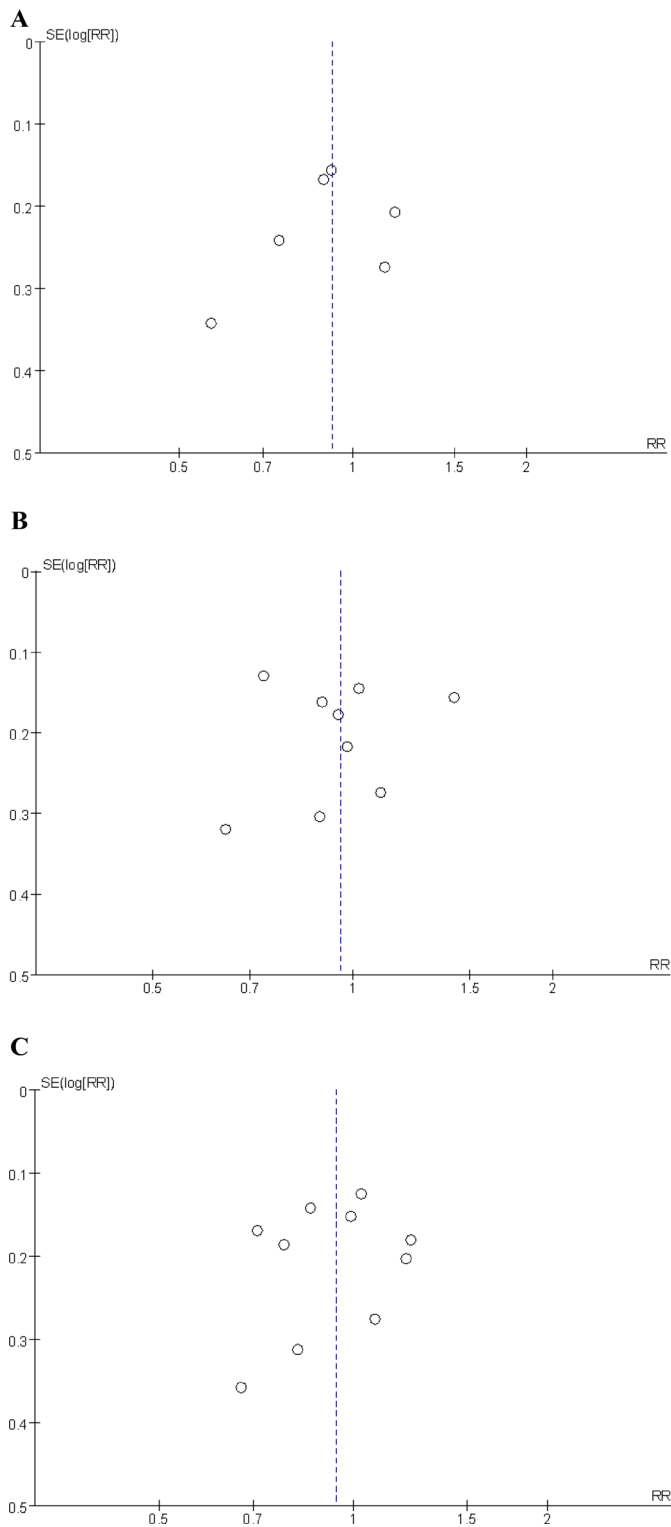

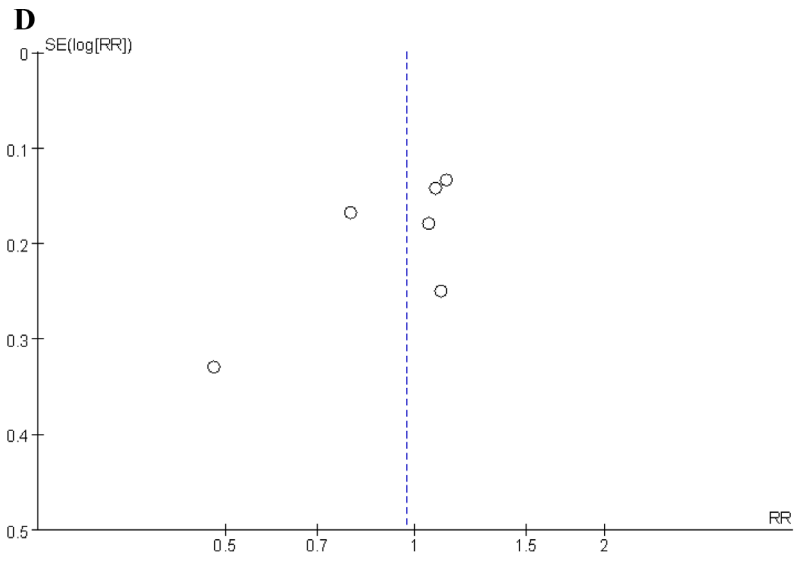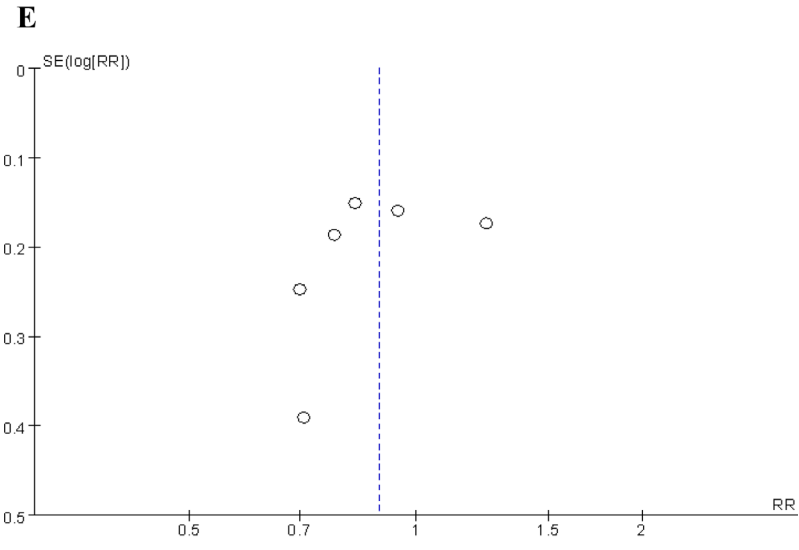

SE: standard error; RR: relative risks.

**Supplementary Figure 1: Funnel plots evaluating publication bias of fruits and vegetables consumption and PC risk.** SE: standard error; RR: relative risks. (A) fruits and vegetables. (B) Fruits. (C) Vegetables. (D) Citrus fruits. (E) Cruciferous vegetables.
